# Supplementary material
Source: Springer Nature journal article supplement (https://www.springermedizin.de/resource/supplementary/12865_2012_473_MOESM2_ESM.pdf/9428040)

| Truncated Peptides | TCL    |     |        |     |        |     |        |     |        |     |        |     | TCC    |     |           |     |
|--------------------|--------|-----|--------|-----|--------|-----|--------|-----|--------|-----|--------|-----|--------|-----|-----------|-----|
|                    | Pat. 1 |     | Pat. 2 |     | Pat. 3 |     | Pat. 4 |     | Pat. 4 |     | Pat. 5 |     | Pat. 6 |     | R9 Pat. 7 |     |
| Art v 1 25-36      | DR1    | DR4 | DR1       | DR4 |
| KCIEWEKAQHGA       | +      | +   | +      | +   | +      | +   | +      | +   | +      | +   | +      | +   | +      | +   | +         | +   |
| CIEWEKAQHGA        | +      | +   | +      | +   | +      | (+) | +      | -   | +      | +   | +      | +   | +      | +   | +         | +   |
| IEWEKAQHGA         | (+)    | -   | +      | +   | +      | -   | -      | -   | -      | -   | +      | +   | +      | +   | +         | +   |
| EWEKAQHGA          | -      | -   | -      | -   | -      | -   | -      | -   | -      | -   | -      | -   | +      | -   | +         | -   |
| WEKAQHGA           | -      | -   | -      | -   | -      | -   | -      | -   | -      | -   | -      | -   | (+)    | -   | -         | -   |
| EKAQHGA            | -      | -   | -      | -   | -      | -   | -      | -   | -      | -   | -      | -   | -      | -   | -         | -   |
| KAQHGA             | -      | -   | -      | -   | -      | -   | -      | -   | -      | -   | -      | -   | -      | -   | -         | -   |
| KCIEWE             | -      | -   | -      | +   | -      | -   | -      | -   | -      | -   | -      | -   | -      | -   | -         | (+) |
| KCIEWEK            | -      | -   | -      | -   | -      | -   | -      | -   | -      | -   | -      | -   | -      | -   | -         | -   |
| KCIEWEKA           | -      | -   | -      | -   | -      | -   | -      | -   | -      | -   | -      | -   | +      | -   | +         | -   |
| KCIEWEKAQ          | -      | -   | -      | -   | -      | -   | -      | -   | -      | -   | -      | -   | +      | -   | +         | -   |
| KCIEWEKAQH         | +      | +   | +      | +   | -      | -   | +      | +   | +      | +   | +      | +   | +      | +   | +         | +   |
| KCIEWEKAQHG        | +      | +   | +      | +   | +      | +   | +      | -   | +      | +   | +      | +   | +      | +   | +         | +   |

K  
C  
I  
E  
W  
E  
K  
A  
Q  
H  
G  
A

p1  
p2  
p3  
p4  
p5  
p6  
p7  
p8  
p9

| Mutant Peptides | TCL    |     |        |     |        |     |        |     |        |     | TCC    |     |            |     |             |     |            |     |           |     |
|-----------------|--------|-----|--------|-----|--------|-----|--------|-----|--------|-----|--------|-----|------------|-----|-------------|-----|------------|-----|-----------|-----|
|                 | Pat. 1 |     | Pat. 2 |     | Pat. 3 |     | Pat. 4 |     | Pat. 7 |     | Pat. 8 |     | R97 Pat. 7 |     | R114 Pat. 7 |     | R24 Pat. 7 |     | R51 Pat.9 |     |
| Art v 1 25-36   | DR1    | DR4 | DR1        | DR4 | DR1         | DR4 | DR1        | DR4 | DR1       | DR4 |
| KCIEWEKAQHGA    | +      | +   | +      | +   | +      | +   | +      | +   | +      | -   | +      | +   | +          | +   | +           | +   | +          | +   | +         | -   |
| ACIEWEKAQHGA    | +      | +   | +      | +   | +      | +   | +      | +   | +      | +   | +      | +   | nd         | nd  | +           | +   | nd         | nd  | +         | +   |
| KAIEWEKAQHGA    | +      | -   | +      | +   | +      | +   | -      | +   | -      | +   | +      | +   | -          | -   | +           | +   | -          | -   | +         | +   |
| KCAIEWEKAQHGA   | -      | -   | +      | -   | -      | -   | +      | -   | -      | -   | -      | -   | -          | -   | -           | -   | -          | -   | -         | -   |
| KCIAIEWEKAQHGA  | -      | -   | -      | -   | +      | +   | -      | -   | -      | -   | -      | -   | +          | +   | -           | -   | -          | -   | -         | -   |
| KCIEAIEWEKAQHGA | -      | -   | -      | -   | -      | -   | -      | -   | -      | -   | -      | -   | -          | -   | -           | -   | -          | -   | -         | -   |
| KCIEWAKAQHGA    | -      | -   | -      | -   | +      | +   | -      | -   | +      | -   | -      | -   | +          | +   | -           | -   | -          | -   | -         | -   |
| KCIEWEAAQHGA    | -      | -   | +      | -   | -      | -   | -      | -   | -      | -   | -      | -   | -          | -   | -           | -   | +          | +   | -         | -   |
| KCIEWEKGQHGA    | +      | +   | +      | +   | +      | -   | +      | +   | +      | -   | +      | +   | +          | +   | +           | +   | +          | -   | +         | +   |
| KCIEWEKAHGA     | -      | +   | -      | -   | -      | -   | +      | +   | +      | (+) | -      | -   | +          | +   | -           | +   | +          | -   | +         | +   |
| KCIEWEKAQAGA    | +      | +   | +      | +   | +      | +   | +      | -   | -      | +   | -      | -   | +          | +   | -           | -   | +          | +   | +         | -   |
| KCIEWEKAQHAA    | +      | +   | +      | +   | +      | +   | +      | +   | -      | +   | +      | +   | +          | +   | +           | +   | +          | +   | -         | -   |
| KCIEWEKAQHGG    | +      | +   | +      | +   | +      | -   | +      | +   | -      | +   | +      | +   | +          | -   | +           | +   | nd         | nd  | -         | -   |

No. of experiments tolerating mutations

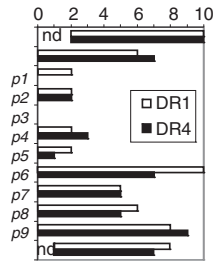

Supplement: MOESM2 [file 9428040]
